# Supplementary material for: Synthesis, Crystal Structure, and Biological Evaluation of a Series of Phloretin Derivatives
Source: PubMed Central journal article supplement (PMC6271035; doi:10.3390/molecules191016447), 2014-10-13
Supplement: molecules-19-16447-s001.pdf [file molecules-19-16447-s001.pdf]

# Supplementary Materials

## Crystal Data

*Acetic acid 4-[3-acetoxy-3-(2,4,6-triacetoxyphenyl)-allyl]-phenyl ester (8)* (C<sub>25</sub>H<sub>24</sub>O<sub>10</sub>): M = 484.44, monoclinic, space group P2(1)/c, a = 11.875(6) Å, b = 16.159(8) Å, c = 13.910(7) Å, α = 90.00(7)°, β = 112.101(7)°, γ = 90.00°, V = 2473(2) Å<sup>3</sup>, Z = 4, D<sub>c</sub> = 1.301 mg/m<sup>3</sup>, F(000) = 1016, T = 296(2) K. A crystal with approximate dimensions of 0.20 × 0.15 × 0.10 mm<sup>3</sup> was mounted on a glass fiber in a random orientation. Crystallographic data were collected with a Siemens Smart-CCD diffractometer with graphite-monochromated MoKα radiation (k = 0.71073 Å). A total of 12146 reflections was measured by ω scan technique at 296(2) K within 1.9 ≤ θ ≤ 25.0°, of which 4365 were independent with R<sub>int</sub> = 0.0396, and 2363 were observed with I ≥ 2σ (I). The structure was solved by Direct Methods and refined by full-matrix least squares on F<sup>2</sup> with anisotropic displacement parameters for all non-hydrogen atoms using Shelxtl-97 program package. The hydrogen atoms were added in idealized geometrical positions. Final R indices [I ≥ 2σ (1)]: R1 = 0.0821, wR2 = 0.2511.

*Acetic acid 4-(7-acetoxy-5-hydroxy-2-methyl-oxo-4H-chromen-3-ylmethyl)-phenyl ester (11)* (C<sub>21</sub>H<sub>18</sub>O<sub>7</sub>): M = 382.35, monoclinic, space group P2(1)/c, a = 7.8575(11) Å, b = 14.470(2) Å, c = 34.172(5) Å, α = 90.00°, β = 101.719(4)°, γ = 90.00°, V = 3804.3(9) Å<sup>3</sup>, Z = 8, D<sub>c</sub> = 1.335 mg/m<sup>3</sup>, F(000) = 1600, T = 296(2) K. A crystal with approximate dimensions of 0.33 × 0.24 × 0.15 mm<sup>3</sup> was mounted on a glass fiber in a random orientation. Crystallographic data were collected with a Siemens Smart-CCD diffractometer with graphite-monochromated MoKα radiation (k = 0.71073 Å). A total of 18857 reflections was measured by ω scan technique at 296(2) K within 1.9 ≤ θ ≤ 25.1°, of which 6723 were independent with R<sub>int</sub> = 0.0736, and 3332 were observed with I ≥ 2σ (I). The structure was solved by Direct Methods and refined by full-matrix leastsquares on F<sup>2</sup> with anisotropic displacement parameters for all non-hydrogen atoms using Shelxtl-97 program package. The hydrogen atoms were added in idealized geometrical positions. Final R indices [I ≥ 2σ (1)]: R1 = 0.1081, wR2 = 0.2060.
